# Supplementary material for: Cobalt Cardiomyopathy Secondary to Hip Arthroplasty: An Increasingly Prevalent Problem
Source: Case Rep Cardiol. 2017 Aug 6;2017:5434571. doi: 10.1155/2017/5434571 (PMC5563425; doi:10.1155/2017/5434571)
Supplement: Supplementary file 1 — Transthoracic echo prior to hip revision (apical 4 chamber [A4C], parasternal long axis [PSLAX] and parasternal short axis [PSSAX] views - September 2014), and post hip revision (October 2015) illustrating clear improvement in left ventricular systolic function. [file 5434571.f1.zip]

Archive with 6 entries (6 files):
- A4C-092014.avi
- A4C-102015 (1).avi
- PSLAX-092014.avi
- PSLAX-102015.avi
- PSSAX-092014.avi
- PSSAX-102015.avi
